# Supplementary material
Source: publisher site journal article supplement (https://www.degruyterbrill.com/publication/isbn/9783805912310/downloadAsset/9783805912310_Inhaltsverzeichnis.pdf)
Supplement: Supplementary file 1 [file 9783805912310_Inhaltsverzeichnis.pdf]

# Inhaltsübersicht

|                                                                          | Seite * |
|--------------------------------------------------------------------------|---------|
| Vorwort _____                                                            | IX      |
| Buch 2 · Recht der Schuldverhältnisse                                    |         |
| Abschnitt 8 · Einzelne Schuldverhältnisse                                |         |
| Titel 12 · Auftrag, Geschäftsbesorgungsvertrag und Zahlungsdienste _____ | 1       |
| Untertitel 1 · Auftrag _____                                             | 101     |
| Untertitel 2 · Geschäftsbesorgungsvertrag _____                          | 235     |
| Sachregister _____                                                       | 445     |

---

\* Zitiert wird nicht nach Seiten, sondern nach Paragraph bzw Artikel und Randnummer; siehe dazu auch „Zitierweise“.
